# Supplementary material
Source: PubMed Central journal article supplement (PMC5560863)
Supplement: NIHMS823428-supplement-supplement_1.pdf [file NIHMS823428-supplement-supplement_1.pdf]

## Supplementary Tables

| <b>Supplementary Table 1: Characteristics of patients included and excluded from the study.</b> |                                       |                                        |                |
|-------------------------------------------------------------------------------------------------|---------------------------------------|----------------------------------------|----------------|
| <b>Variable</b>                                                                                 | <b>Included patients<br/>(n = 72)</b> | <b>Excluded patients<br/>(n = 193)</b> | <b>p-value</b> |
| Age, mean $\pm$ SD                                                                              | 59.2 $\pm$ 11.5                       | 64.1 $\pm$ 12.9                        | 0.005          |
| Gender, n (%)                                                                                   |                                       |                                        | 0.887          |
| Male                                                                                            | 46 (64)                               | 121 (63)                               |                |
| Female                                                                                          | 26 (36)                               | 72 (37)                                |                |
| BMI, mean $\pm$ SD                                                                              | 26.8 $\pm$ 4.0                        | 26.3 $\pm$ 4.5                         | 0.4            |
| Tumor location, n (%)                                                                           |                                       |                                        | 0.128          |
| C18/C19 Colon or rectosigmoid                                                                   | 33 (46)                               | 110 (57)                               |                |
| C20 Rectum                                                                                      | 39 (54)                               | 83 (43)                                |                |
| Stage, n (%)                                                                                    |                                       |                                        | 0.126          |
| 0/I/II                                                                                          | 47 (65)                               | 105 (54)                               |                |
| III/IV                                                                                          | 25 (35)                               | 88 (46)                                |                |

| Supplementary Table 2: Self-administered patient questionnaire for incisional hernia occurrence. |                                                                                                                                                                                                                                                                                                                                                                                                                 |
|--------------------------------------------------------------------------------------------------|-----------------------------------------------------------------------------------------------------------------------------------------------------------------------------------------------------------------------------------------------------------------------------------------------------------------------------------------------------------------------------------------------------------------|
| What is an incisional hernia?                                                                    | 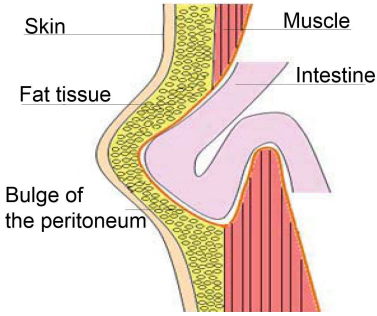 <p style="background-color: yellow;">Surgeries that require the incision of the abdominal cavity, may lead to weak points in the abdominal wall. It is possible that a loophole develops in the area of the scar, through which the intestines can stick out. Subsequently this can lead to a visible bulge at the belly.</p> |
| Question:<br>Did an incisional hernia occur after your surgery?                                  | <p>No</p> <p>Yes</p> <p>Not sure (please specify: _____)</p>                                                                                                                                                                                                                                                                                                                                                    |

| <b>Supplementary Table 3: Phone interview questions to verify the occurrence of an incisional hernia.</b> |                               |
|-----------------------------------------------------------------------------------------------------------|-------------------------------|
| 1. Has an incisional hernia occurred?                                                                     | No<br>Yes                     |
| 2. When has the hernia occurred?                                                                          | _____ months (postoperative)  |
| 3. Did you detect the hernia yourself?                                                                    | No<br>Yes                     |
| 4. Was the hernia confirmed by a physician?                                                               | No<br>Yes                     |
| if "yes":                                                                                                 |                               |
| 4a. Was the hernia confirmed by a physical examination?                                                   | No<br>Yes, date: _____.       |
| 4b. Was the hernia confirmed by sonography?                                                               | No<br>Yes, _____ date: _____. |
| 5. Was the hernia incarcerated?                                                                           | No<br>Yes                     |
| 6. Was the hernia frequently controlled by a physician?                                                   | No<br>Yes                     |
| 6a. Date of last control?                                                                                 | Date: _____.                  |
| 7. Did you have discomfort at the surgery site other than hernia?                                         | No<br>Yes                     |
| 7a. Pain?                                                                                                 | No<br>Yes                     |
| 7b. Reduced muscle load capacity?                                                                         | No<br>Yes                     |
| 7c. Other? If yes, please specify.                                                                        | No<br>Yes: _____.             |
| 8. Symptoms related to hernia?                                                                            | No<br>Yes: _____.             |
| 9. Was a surgery performed to correct the hernia?                                                         | No<br>Yes                     |
| 9a. Date of surgery?                                                                                      | Date: _____.                  |
| 9b. Mesh implantation?                                                                                    | No<br>Yes                     |
| 10. Has the hernia recurred after surgery?                                                                | No<br>Yes                     |
| 10a. Date of recurrence?                                                                                  | Date: _____.                  |
| 11. Have you performed frequent lifting of over 5kg?                                                      | No<br>Yes                     |
| 12. Additional remarks?                                                                                   | _____.                        |
